# Supplementary material for: Distress criterion influences prevalence rates of functional gastrointestinal disorders
Source: Springer Nature journal article supplement (doi:10.1186/s12876-014-0215-9), 2014-12-01
Supplement: MOESM1 [file 9738066]

Table 1: FGID diagnoses with and without subjective distress for the complete sample and for each gender

| <b>Diagnoses according to Rome II</b>             |                       |          |                                    |          |              |          |                           |          |            |          |                         |          |
|---------------------------------------------------|-----------------------|----------|------------------------------------|----------|--------------|----------|---------------------------|----------|------------|----------|-------------------------|----------|
| <b>Diagnosis</b>                                  | <b>Absolute cases</b> | <b>%</b> | <b>Absolute cases (distressed)</b> | <b>%</b> | <b>Women</b> | <b>%</b> | <b>Women (distressed)</b> | <b>%</b> | <b>Men</b> | <b>%</b> | <b>Men (distressed)</b> | <b>%</b> |
| <b>Globus syndrome</b>                            | 58                    | 3.12     | 36                                 | 1.94     | 40           | 3.75     | 26                        | 2.43     | 18         | 2.28     | 10                      | 1.27     |
| <b>Functional chest pain</b>                      | 48                    | 2.58     | 42                                 | 2.26     | 31           | 2.90     | 28                        | 2.62     | 17         | 2.15     | 14                      | 1.77     |
| <b>Functional heart burn</b>                      | 25                    | 1.35     | 11                                 | 0.59     | 10           | 0.94     | 3                         | 0.28     | 15         | 1.90     | 8                       | 1.01     |
| <b>Functional dysphagia</b>                       | 20                    | 1.08     | 16                                 | 0.86     | 14           | 1.31     | 12                        | 1.12     | 6          | 0.76     | 4                       | 0.51     |
| <b>Unspecified functional esophageal disorder</b> | 160                   | 8.62     | 122                                | 6.57     | 107          | 10.02    | 82                        | 7.68     | 53         | 6.72     | 40                      | 5.07     |
| <b>Functional dyspepsia (ulcer-like)</b>          | 151                   | 8.13     | 142                                | 7.65     | 120          | 11.24    | 112                       | 10.49    | 31         | 3.93     | 30                      | 3.80     |
| <b>Functional dyspepsia (dysmotility-like)</b>    | 80                    | 4.31     | 58                                 | 3.12     | 63           | 5.90     | 49                        | 4.59     | 17         | 2.15     | 9                       | 1.14     |
| <b>Functional dyspepsia</b>                       | 45                    | 2.42     | 42                                 | 2.26     | 32           | 3.00     | 31                        | 2.90     | 13         | 1.65     | 11                      | 1.39     |

|                                                                |     |       |     |       |     |       |     |       |     |       |     |       |
|----------------------------------------------------------------|-----|-------|-----|-------|-----|-------|-----|-------|-----|-------|-----|-------|
| <b>(reflux-like)</b>                                           |     |       |     |       |     |       |     |       |     |       |     |       |
| <b>Functional dyspepsia<br/>(unspecified)</b>                  | 116 | 6.25  | 59  | 3.18  | 87  | 8.15  | 44  | 4.12  | 29  | 3.68  | 15  | 1.90  |
| <b>Aerophagia</b>                                              | 144 | 7.75  | 33  | 1.78  | 65  | 6.09  | 16  | 1.49  | 79  | 10.01 | 17  | 2.15  |
| <b>Irritable bowel syndrome</b>                                | 84  | 4.52  | 48  | 2.58  | 64  | 5.99  | 34  | 3.18  | 20  | 2.53  | 14  | 1.77  |
| <b>Irritable bowel syndrome<br/>(diarrhea predominant)</b>     | 66  | 3.55  | 39  | 2.10  | 49  | 4.59  | 27  | 2.53  | 17  | 2.15  | 12  | 1.52  |
| <b>Irritable bowel syndrome<br/>(constipation predominant)</b> | 40  | 2.15  | 22  | 1.18  | 38  | 3.56  | 21  | 1.97  | 2   | 0.25  | 1   | 0.13  |
| <b>Functional constipation</b>                                 | 40  | 2.15  | 39  | 2.10  | 35  | 3.28  | 35  | 3.28  | 5   | 0.63  | 4   | 0.51  |
| <b>Functional diarrhea</b>                                     | 4   | 0.22  | 0   | 0.00  | 1   | 0.09  | 0   | 0.00  | 3   | 0.38  | 0   | 0.00  |
| <b>Functional abdominal<br/>bloating</b>                       | 705 | 37.96 | 274 | 14.75 | 409 | 38.30 | 172 | 16.10 | 296 | 37.52 | 102 | 12.93 |
| <b>Unspecified functional<br/>bowel disorder</b>               | 175 | 9.42  | 137 | 7.38  | 139 | 13.01 | 109 | 10.21 | 36  | 4.56  | 28  | 3.55  |

|                                          |     |      |    |      |     |       |    |      |    |      |    |      |
|------------------------------------------|-----|------|----|------|-----|-------|----|------|----|------|----|------|
| <b>Chronic functional abdominal pain</b> | 158 | 8.51 | 49 | 2.64 | 108 | 10.11 | 36 | 3.37 | 50 | 6.34 | 13 | 1.65 |
| <b>Functional incontinence</b>           | 66  | 3.55 | 65 | 3.50 | 30  | 2.81  | 30 | 2.81 | 36 | 4.56 | 35 | 4.44 |
| <b>Levator syndrome</b>                  | 44  | 2.37 | 35 | 1.88 | 19  | 1.78  | 14 | 1.31 | 25 | 3.17 | 21 | 2.66 |
| <b>Proctalgia fugax</b>                  | 4   | 0.22 | 4  | 0.22 | 3   | 0.28  | 3  | 0.28 | 1  | 0.13 | 1  | 0.13 |

The prevalence rates of the two subgroups of irritable bowel syndrome do not result in the total prevalence of irritable bowel syndrome, because some participants could not be allocated to a subgroup or they met the criteria of both subgroups concomitantly.
