# Supplementary material for: Distress criterion influences prevalence rates of functional gastrointestinal disorders
Source: Springer Nature journal article supplement (doi:10.1186/s12876-014-0215-9), 2014-12-01
Supplement: MOESM2 [file 9738066]

Table 2: Differences in chronic stress and stress reactivity between the three subgroups

| Scale                                           | Descriptive statistics                      |                                            |                                        | Analysis of variance |                  |
|-------------------------------------------------|---------------------------------------------|--------------------------------------------|----------------------------------------|----------------------|------------------|
|                                                 | Healthy control group<br>Mean (SD)<br>n=691 | Non-Distressed group<br>Mean (SD)<br>n=449 | Distressed group<br>Mean (SD)<br>n=717 | F                    | Significance (p) |
| <b>TICS: Work overload</b>                      | 13.81<br>(5.65)                             | 14.28<br>(5.94)                            | 16.38 <sup>+B</sup><br>(6.01)          | 37.35                | < 0.001          |
| <b>TICS: Social work overload</b>               | 6.63<br>(3.87)                              | 6.63<br>(4.03)                             | 7.85 <sup>+B</sup><br>(4.30)           | 19.90                | < 0.001          |
| <b>TICS: Pressure to succeed</b>                | 15.02<br>(4.92)                             | 15.43<br>(5.17)                            | 16.94 <sup>+B</sup><br>(5.30)          | 26.53                | < 0.001          |
| <b>TICS: Work discontent</b>                    | 10.68<br>(5.16)                             | 11.43<br>(4.94)                            | 12.24 <sup>+0</sup><br>(5.32)          | 16.08                | < 0.001          |
| <b>TICS: Overextended at work</b>               | 6.39<br>(3.69)                              | 6.74<br>(3.96)                             | 8.20 <sup>+B</sup><br>(4.07)           | 41.68                | < 0.001          |
| <b>TICS: Lack of social recognition</b>         | 4.04<br>(2.59)                              | 4.36<br>(2.73)                             | 5.31 <sup>+B</sup><br>(3.08)           | 38.06                | < 0.001          |
| <b>TICS: Social tension</b>                     | 5.16<br>(3.65)                              | 5.49<br>(3.31)                             | 6.49 <sup>+B</sup><br>(3.77)           | 25.28                | < 0.001          |
| <b>TICS: Social isolation</b>                   | 7.24<br>(4.87)                              | 7.64<br>(4.86)                             | 8.55 <sup>+0</sup><br>(5.35)           | 12.16                | < 0.001          |
| <b>TICS: Worries</b>                            | 6.10<br>(3.40)                              | 6.72 <sup>†</sup><br>(3.40)                | 8.20 <sup>+B</sup><br>(3.59)           | 67.28                | < 0.001          |
| <b>TICS: screening scale for chronic stress</b> | 15.59<br>(7.31)                             | 16.88 <sup>†</sup><br>(7.39)               | 20.59 <sup>+B</sup><br>(7.70)          | 83.43                | < 0.001          |
| <b>SRS: Reactivity to work overload</b>         | 8.36<br>(2.309)                             | 9.06 <sup>‡</sup><br>(2.40)                | 9.69 <sup>+B</sup><br>(2.32)           | 56.88                | < 0.001          |

|                                             |                 |                              |                               |       |         |
|---------------------------------------------|-----------------|------------------------------|-------------------------------|-------|---------|
| <b>SRS: Reactivity to social conflicts</b>  | 12.63<br>(2.55) | 12.98<br>(2.40)              | 13.59 <sup>+a</sup><br>(2.51) | 26.49 | < 0.001 |
| <b>SRS: Reactivity to social stress</b>     | 9.40<br>(2.33)  | 9.93 <sup>Δ</sup><br>(2.37)  | 10.57 <sup>+a</sup><br>(2.34) | 44.26 | < 0.001 |
| <b>SRS: Reactivity to failure</b>           | 10.42<br>(1.90) | 10.60<br>(1.90)              | 11.17 <sup>+a</sup><br>(1.96) | 28.35 | < 0.001 |
| <b>SRS: Anticipatory reactivity</b>         | 8.35<br>(1.84)  | 8.67 <sup>†</sup><br>(1.79)  | 9.14 <sup>+a</sup><br>(1.67)  | 36.07 | < 0.001 |
| <b>SRS: Prolonged reactivity</b>            | 6.15<br>(1.82)  | 6.39<br>(1.79)               | 7.09 <sup>+a</sup><br>(2.09)  | 43.94 | < 0.001 |
| <b>SRS: Overall stress reactivity score</b> | 55.31<br>(9.04) | 57.64 <sup>‡</sup><br>(8.83) | 61.24 <sup>+a</sup><br>(8.94) | 78.26 | < 0.001 |

<sup>+</sup> significant difference between participants with at least one Rome II diagnosis with consideration of subjective distress and healthy participants ( $\alpha < 0.001$ )

<sup>a</sup> significant difference between participants with at least one Rome II diagnosis with consideration of subjective distress and participants with at least one Rome II diagnosis without distress ( $\alpha < 0.001$ )

<sup>Δ</sup> significant difference between participants with at least one Rome II diagnosis with consideration of subjective distress and participants with at least one Rome II diagnosis without distress ( $\alpha < 0.05$ )

<sup>‡</sup> significant difference between participants with at least one Rome II diagnosis without distress and healthy participants ( $\alpha < 0.001$ )

<sup>Δ</sup> significant difference between participants with at least one Rome II diagnosis without distress and healthy participants ( $\alpha < 0.01$ )

<sup>†</sup> significant difference between participants with at least one Rome II diagnosis without distress and healthy participants ( $\alpha < 0.05$ )
